1 **TITLE**

2 Tolerance of nonsynonymous variation is closely correlated between human and mouse orthologues

3

4 **AUTHORS**

5 George Powell<sup>\*#1,2</sup>, Michelle Simon<sup>\*2</sup>, Sara Pulit<sup>1</sup>, Ann-Marie Mallon<sup>2</sup>, Cecilia M. Lindgren<sup>1,3,4</sup>

6 \*Denotes equal contribution.

7 #Denotes corresponding author

8

9 **AFFILIATIONS**

10 1. Big Data Institute, Li Ka Shing Centre for Health Information and Discovery, University of  
11 Oxford.

12 2. MRC Harwell Institute, Mammalian Genetics Unit, Oxfordshire, UK, OX11 0RD

13 3. Wellcome Centre for Human Genetics, University of Oxford, Oxford, UK

14 4. Medical and Population Genetics Program, Broad Institute of MIT and Harvard, Cambridge,  
15 MA, USA.

16

17 **ABSTRACT**

18

19 Genic constraint describes how tolerant a gene is of nonsynonymous variation before it is removed  
20 from the population by negative selection. Here, we provide the first estimates of intraspecific  
21 constraint for mouse genes genome-wide, and show constraint is positively correlated between human  
22 and mouse orthologues ( $r = 0.806$ ). We assess the relationships between mouse gene constraint and  
23 knockout phenotypes, showing gene constraint is positively associated with pleiotropy (ie an  
24 increased number of phenotype associations ( $R^2 = 0.65$ )), in addition to an enrichment in lethal,  
25 developmental, and craniofacial knockout phenotypes amongst the most constrained genes. Finally,  
26 we show mouse constraint can be used to predict human genes associated with Mendelian disease,  
27 and is positively correlated with an increase in the number of known pathogenic variants in the human

28 orthologue ( $R^2 = 0.23$ ). Our metrics of mouse and human constraint are available to inform future  
29 research using mouse models.

30

31

## 32 **INTRODUCTION**

33

34 Pinpointing the genes, genetic variants, and biological pathways that underpin human disease remains  
35 a foremost focus of biomedical research today. Genome-sequencing has characterised human  
36 variation across global populations, and highlighted differences between genes with regard to the  
37 relative number of nonsynonymous variants they carry (Petrovski et al 2013; Lek et al 2016). This  
38 information has been used to estimate genic constraint, a description of how tolerant a protein-coding  
39 gene is to nonsynonymous variation before it is removed from the population by negative selection  
40 (Bartha et al 2018). Genes are more constrained if a) nonsynonymous variants have a high probability  
41 of affecting gene function, and b) there is strong purifying selection against the affect. Constrained  
42 genes are therefore characterised by a relative depletion of nonsynonymous variation. Multiple  
43 methods have been developed to quantify genic constraint in human populations (reviewed by Bartha  
44 et al 2018). The principle of each method is to quantify the difference between the relative number of  
45 nonsynonymous variants observed in each gene and either the genome-wide average (Petrovski et al  
46 2013; Rackham et al 2015), or the expected number assuming neutral selection (Samocha et al 2014;  
47 Bartha et al 2015; Lek et al 2016; Fadista et al 2017; Cassa et al 2017). Constrained genes fall into a  
48 few known categories: some are essential for viability and development, while others associate with  
49 disease (Bartha et al 2018). Quantifying gene constraint can therefore help with the interpretation of  
50 personal genomes, including the identification of pathogenic variants.

51

52 Notably, genic constraint has not been estimated for mouse, which is the most widely utilised  
53 mammalian model organism for biomedical research (Rosenthal and Brown 2007; Justice and Dhillon  
54 2016; Yue et al 2014), and as a result, the relationships in intraspecific constraint between human and

55 mouse orthologues remains poorly understood. Quantifying differences in constraint between human  
56 and mouse orthologues could inform future clinical research using mouse models. This could be  
57 particularly pertinent for mouse humanization using CRISPR/Cas9 (Li et al 2014), and the clinical  
58 development of new drugs (Minikel et al 2019). Furthermore, quantifying mouse gene constraint  
59 would improve our understanding of the relationships between gene constraint and gene function in-  
60 vivo. The International Mouse Phenotyping Consortium (IMPC) is characterising mammalian gene  
61 function by systematically knocking out mouse genes and using a standardised pipeline to measure  
62 the resulting phenotypes across a spectrum of disease domains (Dickinson et al 2016; Smith and  
63 Epigg 2012; Karp et al 2015). This provides a unique resource to assess the global relationships  
64 between intraspecific gene constraint and gene function.

65

66 This study is the first to quantify intraspecific mouse gene constraint genome-wide and compare  
67 constraint between human and mouse orthologues, characterising genes that are most and least  
68 constrained in both species. We investigate the relationships between mouse gene constraint, mouse  
69 knockout phenotype, and human disease association of the human orthologue.

70

71

## 72 **RESULTS**

73

### 74 **Identifying constrained genes in mice**

75

76 Gene constraint is determined by a relative depletion of intraspecific nonsynonymous variation, and  
77 the power to detect constraint is therefore dependent on the number of variant sites within the  
78 population sample (Bartha et al 2018; Samocha et al 2014). We quantified constraint for mouse genes  
79 using whole genome sequences from the 36 laboratory mouse strains made publicly available by the  
80 Mouse Genomes Project (MGP) (Keane et al 2011). The number of variant sites between the MGP  
81 strains is sufficient to calculate constraint, and is comparable to the number of variant sites in human

82 population samples (supplementary table 2). This is due to the phylogenetic distance between strains  
83 and the inbreeding of lineages which increases the probability of allele fixation by genetic drift  
84 (Adams et al 2015; Willoughby et al 2015).

85

86 We quantified constraint for 18,711 mouse genes as a functional Z-score (funZ). The premise of the  
87 funZ method is to quantify gene constraint by standardising the difference between the observed  
88 number of nonsynonymous (defined here as functional) variants in a gene and the expected number,  
89 predicted using a model trained on the number of synonymous (presumed non-functional and  
90 selectively neutral) variants. Genes with a higher funZ have relatively fewer functional variants than  
91 expected and are considered more constrained (figure 1). The funZ method is adapted from the  
92 missense Z-score method proposed by Samocha et al (2014) to make it suitable for application to the  
93 MGP dataset. There are two main methodological differences between the functional Z-score and the  
94 missense Z-score. First, we expand the definition of functional variation to include nonsense in  
95 addition to missense single nucleotide variants (SNVs). Second, we consider all variants in the MGP  
96 dataset that occur homozygous in one or more of the 36 mouse strains. Methodological differences  
97 result in variation between constraint metrics (Bartha et al 2018). We therefore calculated funZ for  
98 17,367 human genes to standardise comparisons of constraint between human and mouse orthologues.  
99 We used the 1000 Genomes Project (1KGP) dataset (1000 Genomes Project Consortium 2015) as the  
100 source of variation to calculate human constraint to limit bias introduced by case control cohorts that  
101 are included in other publicly available datasets (Lek et al 2016). We consider all variants with a  
102 minor allele frequency (MAF)  $> 0.001$  in the 1KGP dataset, thus increasing the probability that they  
103 occur homozygous within the population (Pemberton et al 2012; Allendorf 1986). FunZ is highly  
104 correlated with other metrics of human gene constraint (supplementary table 5).

105

106 **Correlation in constraint between human and mouse orthologues**

107

108 Orthologues are defined as genes for which speciation has occurred since divergence from the most  
109 recent common ancestor (Herrero et al 2016). They are classified as one-to-one when only one copy  
110 of the gene is found in each species; one-to-many when one gene in one species is orthologous to  
111 multiple genes in another species (ie the gene has multiplied in one lineage but not the other); or  
112 many-to-many when multiple orthologues are found in both species. We calculated constraint for  
113 15,422 mouse, and 14,982 human orthologues defined by Ensembl (Zerbino et al 2018), using the  
114 MGP and 1KGP datasets respectively. Of these, 13,787 are defined as one-to-one orthologues, 902  
115 human and 1,302 mouse genes are defined as one-to-many orthologues, and 293 human and 333  
116 mouse genes are defined as many-to-many orthologues.

117

118 There is a significant positive correlation in constraint between human and mouse orthologues,  
119 computed as a Pearson's product-moment correlation coefficient between funZ ( $r(16268) = 0.806$ ,  
120  $p < 2.2e-16$ ) (figure 2). This correlation is not, however, consistent between orthologous groupings as  
121 one-to-one orthologues are more closely correlated ( $r(13785) = 0.827$ ,  $p < 2.2e-16$ ) than one-to-many  
122 ( $r(1477) = 0.536$ ,  $p = 8.01e-111$ ) and many-to-many orthologues ( $r(1002) = 0.148$ ,  $p = 2.63e-06$ ). We  
123 used Mann-Whitney U tests to assess differences in constraint between one-to-one, one-to-many, and  
124 many-to-many orthologues between human and mice. There is a significant difference in constraint  
125 between each group ( $p < 0.0001$ ), with many-to-many orthologues the least constrained and one-to-  
126 one orthologues the most constrained (figure 3). This is consistent with previous work highlighting  
127 more constrained genes are less likely to have paralogues (Bartha et al 2015; Georgi et al 2013) and  
128 be copy number variable (Rudefer et al 2016).

129

130 We assessed the relationship between intraspecific constraint (measured as funZ) and interspecific  
131 conservation (measured as the percentage of amino-acid sequence that matches between orthologous  
132 genes) by computing the Spearman's Rank correlation. There is a significant positive correlation  
133 between mouse constraint and human-mouse conservation ( $n=16,270$ ,  $r_s=0.566$ ,  $p < 2.2e-16$ ), and  
134 between human constraint and human-mouse conservation ( $n=16,270$ ,  $r_s=0.497$ ,  $p < 2.2e-16$ )

135 (supplementary figure 2). This highlights that constrained genes are more likely to be conserved over  
136 evolutionary time (Bartha et al 2018).

137

### 138 **Gene constraint and knockout phenotype**

139

140 We characterised the relationships between gene constraint and gene function by considering Mouse  
141 Phenotype ontology (MP) annotations from gene knockouts conducted by the IMPC (release 9.1). We  
142 grouped 5,486 gene knockouts studied by the IMPC by their top-level MP terms. Each gene was  
143 included a maximum of once for each top-level term grouping, and top-level terms with less than 50  
144 associated genes were removed from the analysis. IMPC knockouts are subject to a standardised  
145 phenotyping pipeline; however, there is some variation in which phenotyping tests are performed due  
146 to differences in knockout lethality and funding limitations. We therefore compared funZ between all  
147 knockouts annotated with a top-level MP (i.e. knockouts that passed a significance threshold of  
148 0.0001 in one of the associated phenotyping tests), with all knockouts that do not have the top-level  
149 MP annotation but were subject to one or more of the associated phenotyping tests. We used Mann-  
150 Whitney U tests with a Bonferroni correction for multiple testing to assess differences between the  
151 groups (figure 4, supplementary table 6). Eleven of the 21 top-level MP terms comprised genes that  
152 were significantly ( $p < 0.05$ ) more constrained than genes that were tested for but did not have the  
153 top-level MP annotation, with the greatest difference for mortality/aging, craniofacial, and  
154 growth/size/body category phenotypes (figure 4, supplementary table 6). It is of note that the subset of  
155 1,339 knockouts with no IMPC MP annotations are significantly less constrained than the average for  
156 all knockouts ( $p = 2.4e-16$ ).

157

158 Genes can affect multiple, often seemingly unrelated, phenotypes, and this phenomenon is known as  
159 pleiotropy. We hypothesised that the more phenotypes a gene affects (the more pleiotropic a gene is),  
160 the more likely it is to be under selective constraint. To test this hypothesis, we assessed the  
161 relationship between gene constraint and the proportion of MP ontology annotations associated with

162 the IMPC knockout for 5,486 genes. The proportion of MP ontology annotations associated with each  
163 knockout was calculated by dividing the total MP terms associated with each knockout by the  
164 potential number of MP terms (determined by the phenotyping tests that were performed). We binned  
165 knockouts by funZ from 1 to 100 with the least constrained genes in the 1st bin and the most  
166 constrained genes in the 100<sup>th</sup> bin. We performed simple linear regression to predict the median  
167 proportion of MP terms per mouse knockout as a function of funZ percentile bin (figure 5). A  
168 significant regression equation was found ( $F(1, 98) = 140.5, p=1.2e-20$ ) with an R<sup>2</sup> of 0.59. The  
169 predicted proportion of MP terms is equal to  $1.4e-02 + 2.3e-04$  for each percentile increase in funZ.  
170 To assess whether this relationship is consistent for distantly related phenotypes we also performed  
171 simple linear regression to predict the median proportion of top-level MP terms per mouse knockout  
172 as a function of funZ percentile bin (figure 5). The MP ontology is a directed acyclic graph, and it is  
173 possible for one MP term to have multiple top-level terms (Eppig et al 2015). We therefore ensured  
174 only one top-level term was counted per MP term. A significant regression equation was found ( $F(1,$   
175  $98) = 178.4, p=8.6e-24$ ) with an R<sup>2</sup> of 0.65. The predicted number of top-level MP terms is equal to  
176  $6.4e-02 + 9.4e-04$  for each percentile increase in funZ. Our results highlight genic constraint is  
177 positively correlated with an increase in knockout phenotypes, indicating constrained genes are more  
178 likely to be pleiotropic.

179

## 180 **Human disease association**

181

182 Human gene constraint is positively correlated with disease association (Bartha et al 2018). We  
183 considered two hypotheses for assessing the relationships between mouse gene constraint and disease  
184 association of the human orthologue: 1) mouse gene constraint can be used to predict human  
185 orthologues associated with Mendelian disease; 2) mouse gene constraint is positively correlated with  
186 an increase in known pathogenic variants in the human orthologue.

187

188 We considered five lists of human genes associated with Mendelian disease to assess whether mouse  
189 gene constraint can be used to predict association to Mendelian disease of the human orthologue. The  
190 gene lists were curated by Petrovski et al (2013) using keyword searches in the Online Mendelian  
191 Inheritance in Man (OMIM) database, and have been used to assess the predictive performance of  
192 other constraint metrics including the RVIS (Petrovski et al 2013) and missense Z-score (Samocha et  
193 al 2014). Keyword searches included “haploinsufficiency”, “dominant-negative”, “de novo”, and  
194 “recessive”, in addition to a list of all OMIM disease genes. We used logistic regression to assess the  
195 difference in funZ between mouse one-to-one orthologues of human genes with no OMIM disease  
196 gene association (n=9,906), and each of the OMIM gene lists, and assessed predictive power as ROC  
197 (table 1). We benchmarked the predictive power of mouse funZ against funZ for the human gene,  
198 RVIS, missense Z-score, and pLI (table 1). Genes in each of the OMIM lists are significantly more  
199 constrained (measured as funZ, RVIS, missense Z-score and pLI) than genes with no OMIM disease  
200 gene association (table 1). Mouse orthologues of genes in each of the OMIM lists have a significantly  
201 higher funZ (are more constrained) than mouse orthologues of human genes with no OMIM disease  
202 gene association (figure 6, table 1). Mouse funZ has a similar predictive power to human funZ (table  
203 1), with the difference in constraint most pronounced for the “haploinsufficiency” and the “de novo”  
204 gene lists (figure 6).

205

206 We assessed the relationship between mouse gene constraint and the number of known pathogenic  
207 variants in the human orthologue by considering 52,174 pathogenic variants from the ClinVar  
208 database (Landrum et al 2018). Human-mouse orthologues were binned from 1 to 100 based on their  
209 funZ percentile, with the least constrained genes in the 1<sup>st</sup> bin and the most constrained genes in the  
210 100<sup>th</sup> bin. To account for differences in gene length, we averaged pathogenic variants in each gene per  
211 kb. We fit a simple linear regression to predict the mean number of pathogenic variants per kb as a  
212 function of funZ percentile bin for 15,680 mouse and 15,562 human orthologues (figure 7). A  
213 significant regression equation was found for mouse funZ ( $F(1, 98) = 28.64, p=5.7e-07$ ) with an R<sup>2</sup> of  
214 0.226. The predicted number of pathogenic variants per kb = to  $0.99 + 0.01$  for each percentile



215 increase in funZ in the mouse orthologue. This suggests gene constraint can be in part explained by  
216 variants in more constrained genes having an increased likelihood of being pathogenic.

217

218

219

## 220 **DISCUSSION**

221

222 We quantified mouse gene constraint genome-wide, and compared intraspecific constraint between  
223 human and mouse orthologues. Our research has three main findings: First, genic constraint is  
224 positively correlated between human and mouse orthologues. This correlation is not, however,  
225 consistent between orthology types. We show that constraint is more closely correlated between one-  
226 to-one orthologues than one-to-many and many-to-many orthologues. This is consistent with previous  
227 work highlighting more constrained genes are less likely to have paralogues (Bartha et al 2015;  
228 Georgi et al 2013) and be copy number variable (Rudefer et al 2016). Second, mouse gene constraint  
229 is positively correlated with an increased number of knockout phenotype annotations, suggesting  
230 genes that are pleiotropic (ie influence multiple phenotypes and pathways) are more likely to be under  
231 selective constraint. We furthermore highlight an enrichment of constrained genes in mice that are  
232 associated with lethality, developmental and craniofacial knockout phenotypes. Third, mouse  
233 constraint can be used to predict human genes associated with Mendelian disease, and is positively  
234 correlated with an increase in the number of known pathogenic variants in the human orthologue. This  
235 is best explained by the correlation in constraint between mouse and human orthologues, as human  
236 gene constraint has been previously shown to correlate with disease association and pathogenic  
237 variant enrichment (Bartha et al 2018).

238

239 Estimates of gene constraints are dependent on methodological assumptions and the source of genetic  
240 variation on which they are based (Bartha et al 2018). To calculate constraint for mouse genes we  
241 used sequence variation from 36 mouse strains that have been inbred to achieve homology of genetic

242 backgrounds (Adams et al 2015). In diploid organisms, selection strength, and therefore constraint, is  
243 influenced by penetrance and zygosity (Fuller et al 2018). For example, variants may be under  
244 stronger negative selection in homozygous individuals than heterozygous if there is lower penetrance  
245 associated with heterozygosity. Inbreeding increases homozygosity and the probability that  
246 deleterious recessive alleles will be removed from the population by negative selection (Willoughby  
247 et al 2015). Our estimate of mouse gene constraint is therefore biased towards identifying genes that  
248 are intolerant of homozygous variation. To account for this in our estimate of human gene constraint  
249 we only considered variants with an MAF > 0.001, thus increasing the probability that they occur  
250 homozygous within the population (Pemberton et al 2012; Allendorf 1986).

251

252 We observed a greater correlation in intraspecific constraint between human and mouse orthologues  
253 compared with the correlation between intraspecific constraint and interspecific conservation. This  
254 has two potential explanations: First, selection pressure and therefore constraint can change over  
255 evolutionary time, and this may have led to deviation in the amino-acid sequences of orthologous  
256 genes since the lineages diverged. Second, there is regional variability in constraint within genes due  
257 to differences in the functional importance of loci (Havrilla et al 2018). This could result in within-  
258 gene deviation in the amino acid sequence at loci that are of less functional importance.

259

260 In conclusion, the positive correlation in constraint between human and mouse orthologues indicates a  
261 positive correlation in functional importance between orthologous genes. The strength of this  
262 correlation supports the use of mouse as a model for understanding the mechanistic basis of gene  
263 function and human monogenic disease.

264

265

## 266 **METHODS**

267

268 **Defining genes, quality variants, and coding consequences**

269

270 We used two highly curated publicly available datasets as sources of genetic variation to calculate  
271 constraint for human and mouse genes: the Mouse Genomes Project dataset for mice (Keane et al  
272 2011), and the 1000 Genomes Project (Phase 3) dataset for humans (1000 Genomes Project  
273 Consortium 2015). We considered all protein-coding genes with a HUGO Gene Nomenclature  
274 Committee name, and defined the coding sequence for each gene by their Ensembl canonical  
275 transcript (release 94) (Zerbino et al 2018). We considered all single nucleotide variants (SNVs) with  
276 “PASS” filter status as described by the 1000 Genomes Project and Mouse Genomes Project (1000  
277 Genomes Project Consortium 2015; Keane et al 2011). Genes were filtered that do not have one or  
278 more SNV in their canonical transcript. Measurements of constraint are biased towards longer genes  
279 with more variants, and we therefore removed genes with a canonical transcript > 1.5 kb, or more than  
280 300 SNVs. This left 17,367 human and 18,710 mouse genes for analysis. Orthologous genes were  
281 defined by Ensembl (release 94) (Zerbino et al 2018). The final dataset consists of 14,982 human and  
282 15,422 mouse genes with one or more orthologue, including 13,787 one-to-one orthologues; 1,479  
283 one-to-many orthologues consisting of 902 unique human and 1302 unique mouse genes respectively;  
284 and 1,004 many-to-many orthologues consisting of 293 unique human and 333 unique mouse genes  
285 respectively.

286

287 We classified SNVs as “functional” and “nonfunctional” based on their annotated consequences for  
288 the amino-acid sequence (supplementary table 1). Functional variants are assumed to change the  
289 amino-acid sequence, and non-functional variants are assumed to be silent. The coding consequences  
290 of SNVs in the 1000 Genomes Project and Mouse Genomes Project datasets were determined using  
291 the Ensembl Variant Effect Predictor (v94.5) (McLaren et al 2016). One consequence was  
292 determined per SNV using the “--pick” argument which prioritises annotations by canonical transcript  
293 status. We defined missense and nonsense variants as functional, and synonymous variants as non-  
294 functional.

295

## 296 **Calculating sequence-specific probabilities of variation**

297

298 The probability of a DNA sequence incurring a substitution mutation is in part dependent on its local  
299 sequence context (Aggarwala and Voight 2016). Consistent with the missense Z-score method  
300 (Samocha et al 2014), we considered the trinucleotide context for calculating gene-specific  
301 probabilities of substitution (ie the probability of  $Y_1$  in the trinucleotide  $XY_1Z$  mutating to  $Y_2$  in the  
302 trinucleotide  $XY_2Z$  is dependent on  $X$  and  $Z$ ). We estimated the 192 relative substitution rate  
303 probabilities of the middle base in each of the 64 potential trinucleotides for humans and mice by  
304 considering the intergenic SNVs in the 1000 Genomes Project and Mouse genomes Project datasets,  
305 and using human to chimpanzee (*Pan troglodytes*) and mouse (*Mus musculus*) to *Mus Caroli*  
306 alignments from Ensembl (release 94) to infer the mutational direction for each SNV (ie which of the  
307 reference and alternate bases is the “ancestral” and “mutant”). We inferred the ancestral and mutant  
308 bases for each SNV following two assumptions: a) the ancestral base is the reference base, or the  
309 alternate base if the alternate base is shared with the related species; b) the mutant base is the alternate  
310 base or the reference base if the alternate is shared with the related species. For each trinucleotide, we  
311 calculated the relative probabilities of substitution by dividing the observed number of intergenic  
312 trinucleotide changes by the number of the trinucleotide in the intergenic ancestral sequence.  
313 Trinucleotide mutation rate probabilities estimated for the human and mouse lineages are highly  
314 correlated ( $r(190)=0.995$ ,  $p=2.0e-192$ )(supplementary figure 1). We used the trinucleotide mutation  
315 rate probability tables to estimate the probabilities of incurring synonymous and functional mutations  
316 for human and mouse genes by considering the coding consequences for each potential substitution in  
317 the canonical transcript, and totalling the trinucleotide specific probabilities of mutation.  
318 Trinucleotide mutation rate tables and gene-specific probabilities of mutation for humans and mice  
319 are provided in the supplementary information.

320

## 321 **Calculating regional and intron mutation rates**

322

323 Mutation rates vary throughout the genome (Hodgkinson and Eyre-Walker 2011). We therefore  
324 estimated the regional mutation rate for each gene by counting the number of SNVs within the genes  
325 start and end coordinates plus 1Mbp upstream and downstream, and dividing by the difference  
326 between the start and end coordinates plus 2,000,000. In addition, we estimated the intron mutation  
327 rate for each gene canonical transcript by dividing the number of intron SNVs ( $MAF > 0.001$ ) with  
328 the sum of intron lengths. Regional mutation rates for human and mouse genes are provided in the  
329 supplementary information.

330

### 331 **Calculating gene constraint as the functional Z-score (funZ)**

332

333 We quantified constraint for mouse and human genes as a functional Z-score. FunZ is calculated in a  
334 two-stage process. First, we built a model to predict the number of SNVs in each gene assuming no  
335 selection pressure by regressing the number of common ( $MAF > 0.001$ ) synonymous variants against  
336 the genes sequence-specific probability of synonymous mutation, regional mutation rate, and intron  
337 mutation rate. Model fit and covariate significance are provided in supplementary table 3. To compare  
338 the impact of MAF on the results, we calculated constraint for human genes across a range of MAF  
339 thresholds ( $MAF > 0.001$ ,  $MAF > 0.0005$ , and  $MAF > 0.0001$ ), and funZ is closely correlated  
340 between the results (supplementary figure 4). The Mouse Genomes Project dataset has a greater ratio  
341 of synonymous variants to functional variants compared to the 1000 Genomes Project Dataset. This  
342 can be explained by the increased probability of synonymous fixation by genetic drift during the  
343 selective breeding of inbred strains (Willoughby et al 2015). To account for this we divided the  
344 number of synonymous variants in each gene in the Mouse Genomes Project dataset by two before  
345 regression. Second, we use this model to predict the expected number of functional SNVs in each  
346 gene, given neutral selection, by substituting in the genes sequence-specific probability of functional  
347 mutation. We standardised the difference between the observed and expected number of common  
348 functional variants for each gene as a Z-score (funZ). Genes with a higher funZ have relatively fewer  
349 common functional variants than expected and are considered more constrained (figure 1).

350

351 **Correlation between human and mouse orthologues, and with other measures of intraspecific**  
352 **constraint and interspecific conservation**

353

354 Human-mouse orthologues were defined by Ensembl (release 94) (Zerbino et al 2018), and correlation  
355 in constraint between orthologous genes was calculated as a Pearson's product-moment correlation  
356 coefficient between funZ. We calculated the Spearman's Rank correlation between human constraint  
357 measured as funZ, and previously published measures of intraspecific constraint (RVIS, missense Z-  
358 score, and pLI) (supplementary table 5). We calculated the Spearman's Rank correlation between  
359 human and mouse constraint measured as funZ, and interspecific conservation measured as the mean  
360 percentage of amino-acid sequence that matches between orthologues (Query % ID and Target % ID)  
361 (Zerbino et al 2018) (supplementary figure 2).

362

363 **Assessing mouse constraint and knockout phenotype**

364

365 We investigated the relationship between gene constraint measured as funZ and gene function by  
366 considering knockout phenotypes for 5,486 genes from the IMPC)(release 9.1. Knock-out phenotypes  
367 are quantified using a standardised pipeline and annotated in the MP(Smith and Epigg 2012). We  
368 grouped genes by associated top-level MP term. Each gene was included a maximum of once in each  
369 group. We discarded top-level MP terms with less than 50 associated knockouts. We also curated a  
370 list of genes that have been knocked out by the IMPC, but have no MP annotations. IMPC knockouts  
371 are subject to different phenotyping pipelines due to due to differences in lethality and ethical  
372 limitations. We therefore compared funZ between all knockouts annotated with a top-level MP (ie  
373 knockouts that passed a significance threshold of 0.0001 in one of the associated phenotyping tests),  
374 with all knockouts that do not have the top-level MP annotation but were subject to one or more of the  
375 associated phenotyping tests. We used Mann-Whitney U tests with a Bonferroni correction for  
376 multiple testing to assess differences between groups.

377

378 We investigated the relationship between gene constraint and the proportion of MP terms associated  
379 with the IMPC knockout, to serve as a proxy for the pleiotropic effect of a gene. The proportion of  
380 MP ontology annotations associated with each knockout was calculated by dividing the total MP  
381 terms associated with each knockout by the potential number of MP terms (determined by the  
382 phenotyping tests that were performed). We binned 5,486 IMPC knockouts by funZ from 1 to 100  
383 with the least constrained genes in the 1<sup>st</sup> bin and the most constrained genes in the 100<sup>th</sup> bin. We  
384 performed two simple linear regressions: 1) to predict the median proportion of unique MP terms per  
385 mouse knockout as a function of funZ percentile bin, and 2) to predict the median proportion of  
386 unique top-level MP terms per mouse knockout as a function of funZ percentile bin. The MP ontology  
387 is a directed acyclic graph, and it is possible for one MP term to have multiple top-level terms. We  
388 therefore ensured only one top-level MP term was counted per MP term.

389

### 390 **Assessing mouse constraint and human disease gene association**

391

392 We benchmarked the ability of human and mouse funZ to predict genes associated with Mendelian  
393 disease against the publicly available constraint metrics RVIS (Pertovski et al 2013), missense Z-  
394 score (Samocha et al 2014), and pLI (Lek et al 2016). We considered five lists of human genes  
395 associated with human disease curated by Petrovski et al (2013) using keyword searches in the Online  
396 Mendelian Inheritance in Man database. Keyword searches included “haploinsufficiency”,  
397 “dominant-negative”, “de novo”, and “recessive”, in addition to a list of all OMIM disease genes. We  
398 used univariate logistic regression models to assess the difference in constraint measured as funZ,  
399 RVIS, missense Z-score, pLI between genes with no OMIM disease gene association, and each of the  
400 OMIM gene lists, in addition to a multivariate model including each constraint metric as a covariate.  
401 We assessed predictive power of each model as the area under the curve of the Receiver Operating  
402 Characteristic (ROC).

403

404 Human pathogenic variants were obtained from ClinVar (Landrum et al 2018). The Ensembl  
405 canonical transcripts for SNVs labelled “pathogenic” or “likely pathogenic” were identified using the  
406 Ensembl Variant Effect Predictor (v94.5). This left 52,174 pathogenic variants for analysis in human  
407 genes with mouse orthologues for which funZ is calculated. Human-mouse orthologues were binned  
408 from 1 to 100 based on their funZ percentile, with the least constrained genes in the 1<sup>st</sup> bin and the  
409 most constrained genes in the 100<sup>th</sup> bin. To account for differences in gene length, we averaged  
410 pathogenic variants in each gene per kb. We fit simple linear regression models to predict the mean  
411 number of pathogenic variants per kb as a function of funZ percentile bin for 15,680 mouse and  
412 15,562 human orthologues.

413

414

#### 415 **REFERENCES**

416

417 1000 Genomes Project Consortium, Adam Auton, Lisa D. Brooks, Richard M. Durbin, Erik P.  
418 Garrison, Hyun Min Kang, Jan O. Korb, et al. 2015. “A Global Reference for Human Genetic  
419 Variation.” *Nature* 526 (7571): 68–74.

420

421 Adams, David J., Anthony G. Doran, Jingtao Lilue, and Thomas M. Keane. 2015. “The Mouse  
422 Genomes Project: A Repository of Inbred Laboratory Mouse Strain Genomes.” *Mammalian Genome:  
423 Official Journal of the International Mammalian Genome Society* 26 (9-10): 403–12.

424

425 Aggarwala, Varun, and Benjamin F. Voight. 2016. “An Expanded Sequence Context Model Broadly  
426 Explains Variability in Polymorphism Levels across the Human Genome.” *Nature Genetics* 48 (4):  
427 349–55.

428

429 Allendorf, Fred W. 1986. “Genetic Drift and the Loss of Alleles Versus Heterozygosity.” *Zoo Biology*  
430 518: 1–190.



431

432 Bartha, István, Julia di Iulio, J. Craig Venter, and Amalio Telenti. 2018. “Human Gene Essentiality.”  
433 *Nature Reviews. Genetics* 19 (1): 51–62.

434

435 Bartha, István, Antonio Rausell, Paul J. McLaren, Pejman Mohammadi, Manuel Tardaguila, Nimisha  
436 Chaturvedi, Jacques Fellay, and Amalio Telenti. 2015. “The Characteristics of Heterozygous Protein  
437 Truncating Variants in the Human Genome.” *PLoS Computational Biology* 11 (12): e1004647.

438

439 Cassa, Christopher A., Donate Weghorn, Daniel J. Balick, Daniel M. Jordan, David Nusinow, Kaitlin  
440 E. Samocha, Anne O’Donnell-Luria, et al. 2017. “Estimating the Selective Effects of Heterozygous  
441 Protein-Truncating Variants from Human Exome Data.” *Nature Genetics* 49 (5): 806–10.

442

443 Dickinson, Mary E., Ann M. Flenniken, Xiao Ji, Lydia Teboul, Michael D. Wong, Jacqueline K.  
444 White, Terrence F. Meehan, et al. 2016. “High-Throughput Discovery of Novel Developmental  
445 Phenotypes.” *Nature* 537 (7621): 508–14.

446

447 Eppig, Janan T., Judith A. Blake, Carol J. Bult, James A. Kadin, Joel E. Richardson, and Mouse  
448 Genome Database Group. 2015. “The Mouse Genome Database (MGD): Facilitating Mouse as a  
449 Model for Human Biology and Disease.” *Nucleic Acids Research* 43 (Database issue): D726–36.

450

451 Fadista, João, Nikolay Oskolkov, Ola Hansson, and Leif Groop. 2017. “LoFtool: A Gene Intolerance  
452 Score Based on Loss-of-Function Variants in 60 706 Individuals.” *Bioinformatics* 33 (4): 471–74.

453

454 Fuller, Zachary, Jeremy J. Berg, Hakhamanesh Mostafavi, Guy Sella, and Molly Przeworski. 2018.  
455 “Measuring ‘Intolerance to Mutation’ in Human Genetics.” *bioRxiv*. <https://doi.org/10.1101/382481>.

456

457 Georgi, Benjamin, Benjamin F. Voight, and Maja Bućan. 2013. “From Mouse to Human:  
458 Evolutionary Genomics Analysis of Human Orthologues of Essential Genes.” *PLoS Genetics* 9 (5):  
459 e1003484.

460

461 Gussow, Ayal B., Slavé Petrovski, Quanli Wang, Andrew S. Allen, and David B. Goldstein. 2016.  
462 “The Intolerance to Functional Genetic Variation of Protein Domains Predicts the Localization of  
463 Pathogenic Mutations within Genes.” *Genome Biology* 17 (January): 9.

464

465 Havrilla, James M., Brent S. Pedersen, Ryan M. Layer, and Aaron R. Quinlan. 2018. “A Map of  
466 Constrained Coding Regions in the Human Genome.” *Nature Genetics*, December.  
467 <https://doi.org/10.1038/s41588-018-0294-6>.

468

469 Herrero, Javier, Matthieu Muffato, Kathryn Beal, Stephen Fitzgerald, Leo Gordon, Miguel Pignatelli,  
470 Albert J. Vilella, et al. 2016. “Ensembl Comparative Genomics Resources.” *Database: The Journal of*  
471 *Biological Databases and Curation* 2016 (February). <https://doi.org/10.1093/database/bav096>.

472

473 Hodgkinson, Alan, and Adam Eyre-Walker. 2011. “Variation in the Mutation Rate across Mammalian  
474 Genomes.” *Nature Reviews. Genetics* 12 (11): 756–66.

475

476 Iulio, Julia di, Istvan Bartha, Emily H. M. Wong, Hung-Chun Yu, Victor Lavrenko, Dongchan Yang,  
477 Inkyung Jung, et al. 2018. “The Human Noncoding Genome Defined by Genetic Diversity.” *Nature*  
478 *Genetics*, February. <https://doi.org/10.1038/s41588-018-0062-7>.

479

480 Justice, Monica J., and Paraminder Dhillon. 2016. “Using the Mouse to Model Human Disease:  
481 Increasing Validity and Reproducibility.” *Disease Models & Mechanisms* 9 (2): 101–3.

482

483 Karp, Natasha A., Terry F. Meehan, Hugh Morgan, Jeremy C. Mason, Andrew Blake, Natalja  
484 Kurbatova, Damian Smedley, et al. 2015. "Applying the ARRIVE Guidelines to an In Vivo  
485 Database." *PLoS Biology* 13 (5): e1002151.  
486  
487 Keane, Thomas M., Leo Goodstadt, Petr Danecek, Michael A. White, Kim Wong, Binnaz Yalcin,  
488 Andreas Heger, et al. 2011. "Mouse Genomic Variation and Its Effect on Phenotypes and Gene  
489 Regulation." *Nature* 477 (7364): 289–94.  
490  
491 Landrum, Melissa J., Jennifer M. Lee, Mark Benson, Garth R. Brown, Chen Chao, Shanmuga  
492 Chitipiralla, Baoshan Gu, et al. 2018. "ClinVar: Improving Access to Variant Interpretations and  
493 Supporting Evidence." *Nucleic Acids Research* 46 (D1): D1062–67.  
494  
495 Lek, Monkol, Konrad J. Karczewski, Eric V. Minikel, Kaitlin E. Samocha, Eric Banks, Timothy  
496 Fennell, Anne H. O'Donnell-Luria, et al. 2016. "Analysis of Protein-Coding Genetic Variation in  
497 60,706 Humans." *Nature* 536 (7616): 285–91.  
498  
499 Li, Feng, Dale O. Cowley, Debra Banner, Eric Holle, Liguozhang, and Lishan Su. 2014. "Efficient  
500 Genetic Manipulation of the NOD-Rag1<sup>-/-</sup>IL2RgammaC-Null Mouse by Combining in Vitro  
501 Fertilization and CRISPR/Cas9 Technology." *Scientific Reports* 4 (June): 5290.  
502  
503 McLaren, William, Laurent Gil, Sarah E. Hunt, Harpreet Singh Riat, Graham R. S. Ritchie, Anja  
504 Thormann, Paul Flicek, and Fiona Cunningham. 2016. "The Ensembl Variant Effect Predictor."  
505 *Genome Biology* 17 (1): 122.  
506  
507 Meehan, Terrence F., Nathalie Conte, David B. West, Julius O. Jacobsen, Jeremy Mason, Jonathan  
508 Warren, Chao-Kung Chen, et al. 2017. "Disease Model Discovery from 3,328 Gene Knockouts by  
509 The International Mouse Phenotyping Consortium." *Nature Genetics* 49 (8): 1231–38.

510

511 Minikel, Eric Vallabh, Konrad J. Karczewski, Hilary C. Martin, Beryl B. Cummings, Nicola Whiffin,  
512 Jessica Alföldi, Richard C. Trembath, et al. 2019. “Evaluating Potential Drug Targets through Human  
513 Loss-of-Function Genetic Variation.” *bioRxiv*. <https://doi.org/10.1101/530881>.

514

515 Neale, Benjamin M., Yan Kou, Li Liu, Avi Ma’ayan, Kaitlin E. Samocha, Aniko Sabo, Chiao-Feng  
516 Lin, et al. 2012. “Patterns and Rates of Exonic de Novo Mutations in Autism Spectrum Disorders.”  
517 *Nature* 485 (7397): 242–45.

518

519 Pemberton, Trevor J., Devin Absher, Marcus W. Feldman, Richard M. Myers, Noah A. Rosenberg,  
520 and Jun Z. Li. 2012. “Genomic Patterns of Homozygosity in Worldwide Human Populations.”  
521 *American Journal of Human Genetics* 91 (2): 275–92.

522

523 Perlman, Robert L. 2016. “Mouse Models of Human Disease: An Evolutionary Perspective.”  
524 *Evolution, Medicine, and Public Health* 2016 (1): 170–76.

525

526 Petrovski, Slavé, Ayal B. Gussow, Quanli Wang, Matt Halvorsen, Yujun Han, William H. Weir,  
527 Andrew S. Allen, and David B. Goldstein. 2015. “The Intolerance of Regulatory Sequence to Genetic  
528 Variation Predicts Gene Dosage Sensitivity.” *PLoS Genetics* 11 (9): e1005492.

529

530 Petrovski, Slavé, Quanli Wang, Erin L. Heinzen, Andrew S. Allen, and David B. Goldstein. 2013.  
531 “Genic Intolerance to Functional Variation and the Interpretation of Personal Genomes.” *PLoS*  
532 *Genetics* 9 (8): e1003709.

533

534 Rackham, Owen J. L., Hashem A. Shihab, Michael R. Johnson, and Enrico Petretto. 2015. “EvoTol:  
535 A Protein-Sequence Based Evolutionary Intolerance Framework for Disease-Gene Prioritization.”  
536 *Nucleic Acids Research* 43 (5): e33.

537

538 Rosenthal, Nadia, and Steve Brown. 2007. "The Mouse Ascending: Perspectives for Human-Disease  
539 Models." *Nature Cell Biology* 9 (9): 993–99.

540

541 Ruderfer, Douglas M., Tymor Hamamsy, Monkol Lek, Konrad J. Karczewski, David Kavanagh,  
542 Kaitlin E. Samocha, Exome Aggregation Consortium, et al. 2016. "Patterns of Genic Intolerance of  
543 Rare Copy Number Variation in 59,898 Human Exomes." *Nature Genetics* 48 (10): 1107–11.

544

545 Samocha, Kaitlin E., Elise B. Robinson, Stephan J. Sanders, Christine Stevens, Aniko Sabo, Lauren  
546 M. McGrath, Jack A. Kosmicki, et al. 2014. "A Framework for the Interpretation of de Novo  
547 Mutation in Human Disease." *Nature Genetics* 46 (9): 944–50.

548

549 Smith, Cynthia L., and Janan T. Eppig. 2012. "The Mammalian Phenotype Ontology as a Unifying  
550 Standard for Experimental and High-Throughput Phenotyping Data." *Mammalian Genome: Official  
551 Journal of the International Mammalian Genome Society* 23 (9-10): 653–68.

552

553 Willoughby, Janna R., Nadia B. Fernandez, Maureen C. Lamb, Jamie A. Ivy, Robert C. Lacy, and J.  
554 Andrew DeWoody. 2015. "The Impacts of Inbreeding, Drift and Selection on Genetic Diversity in  
555 Captive Breeding Populations." *Molecular Ecology* 24 (1): 98–110.

556

557 Yue, Feng, Yong Cheng, Alessandra Breschi, Jeff Vierstra, Weisheng Wu, Tyrone Ryba, Richard  
558 Sandstrom, et al. 2014. "A Comparative Encyclopedia of DNA Elements in the Mouse Genome."  
559 *Nature* 515 (7527): 355–64.

560

561 Zerbino, Daniel R., Premanand Achuthan, Wasiru Akanni, M. Ridwan Amode, Daniel Barrell,  
562 Jyothish Bhai, Konstantinos Billis, et al. 2018. "Ensembl 2018." *Nucleic Acids Research* 46 (D1):  
563 D754–61.

564

565 Zerbino, Daniel R., Steven P. Wilder, Nathan Johnson, Thomas Juettemann, and Paul R. Flicek. 2015.

566 “The Ensembl Regulatory Build.” *Genome Biology* 16 (March): 56.

567

568

569 **FIGURES**

570

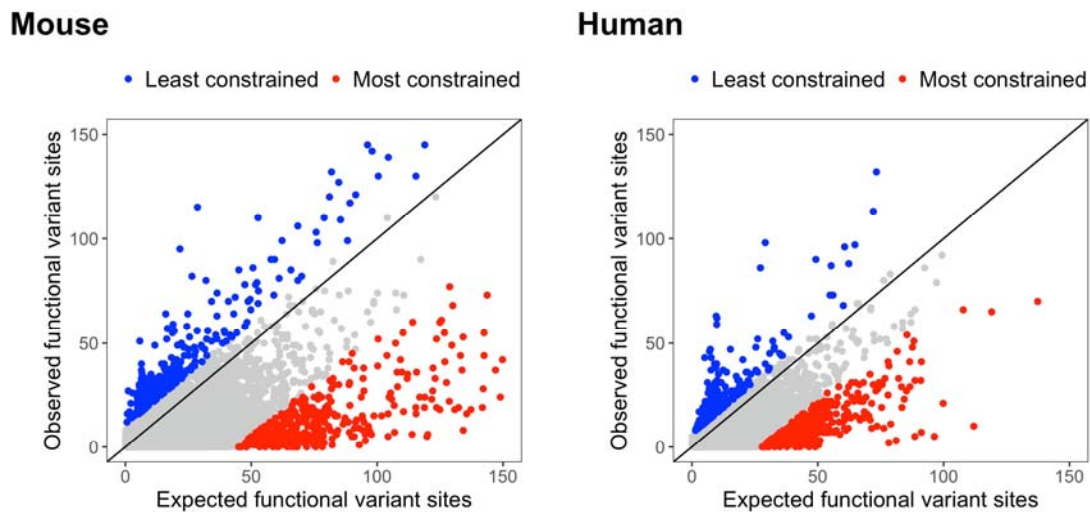

571

572 **Figure 1** – Scatter plots highlighting the relationship between the observed and expected common  
573 functional variant sites for mouse genes (n = 18,711) and human genes (n = 17,368). Variants are  
574 defined as “common” and “functional” if they have a MAF > 0.001, and are annotated as altering the  
575 amino-acid sequence of the protein. The expected number of functional variants is predicted with a  
576 model trained on the number of synonymous (presumed selectively neutral) variants. Constrained  
577 genes have proportionately fewer observed common functional variant sites than expected given no  
578 selection. The plots are annotated for the two percent most constrained and least constrained genes in  
579 red and blue respectively.

580

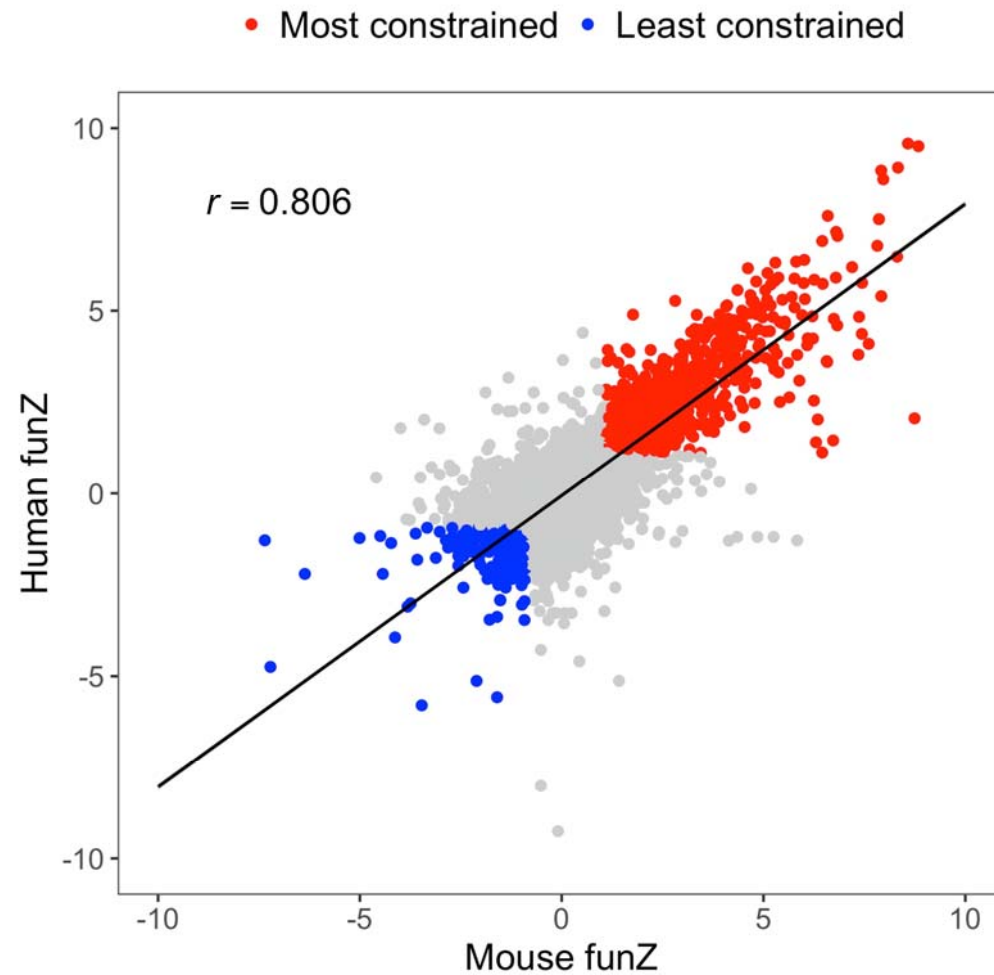

581

582 **Figure 2** -- Constraint is correlated between human and mouse orthologues ( $r(16268) = 0.806$ ,  
583  $p < 2.2e-16$ ). Constraint was quantified for 15,422 mouse, and 14,982 human orthologues as funZ with  
584 a higher score indicating a greater degree of constraint. The most constrained orthologues in humans  
585 ( $n = 1,324$ ) and mice ( $n = 1,321$ ) were categorized as those that ranked among the top 10% for  
586 constraint in both species, and are annotated in red. The least constrained orthologues in humans ( $n =$   
587  $327$ ) and mice ( $n = 363$ ) were categorized as those that ranked among the bottom 10% for constraint  
588 in both species, and are annotated in blue.

589

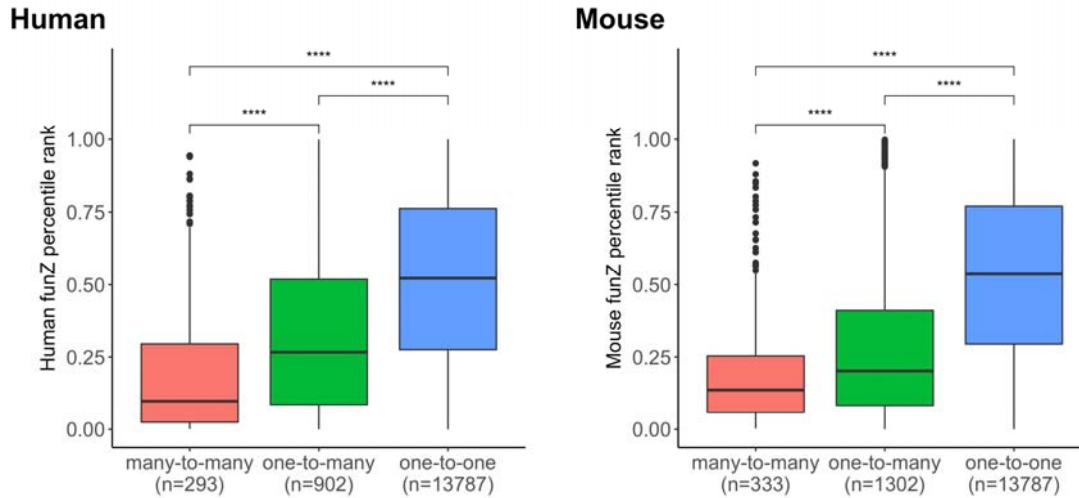

590

591 **Figure 3** -- Distributions of constraint by orthology types (one-to-one, one-to-many, and many-to-  
592 many) for human and mouse orthologues. Constraint is quantified as funZ, with a higher score  
593 indicating a greater degree of constraint. Mann-Whitney U tests were used to assess differences  
594 between groups. There is a significant difference in constraint between each group ( $p < 0.0001$ ), with  
595 many-to-many orthologues the least constrained and one-to-one orthologues the most constrained.

596



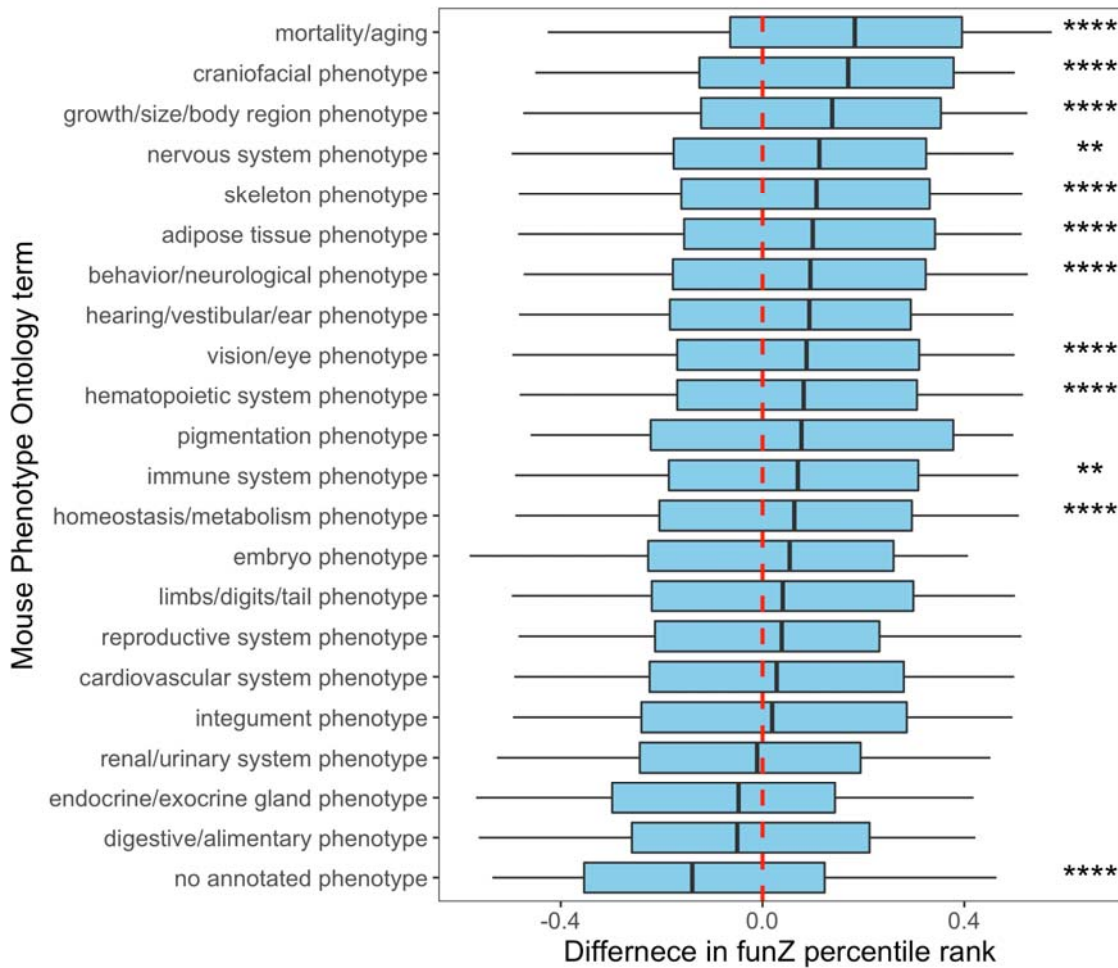

597

598 **Figure 4** – Differences in constraint between mouse genes associated with 21 top-level phenotype  
599 terms from the Mammalian Phenotype (MP) Ontology, and for knockouts with no annotated MP  
600 terms from the International Mouse Phenotyping Consortium (IMPC). We assessed 5,486 knockouts  
601 conducted by the IMPC. Constraint was quantified for each knockout as the percentile rank of funZ,  
602 with a higher score indicating a greater degree of constraint. The difference in funZ from each MP  
603 grouping was standardised against the median funZ of knockouts that have had one or more MP  
604 associated phenotyping test in the IMPC pipeline but are not annotated with the MP, indicated by the  
605 red line. Mann-Whitney U tests were conducted with a Bonferroni correction for multiple testing to  
606 assess significance between groups (\* signify significance thresholds of 0.05, 0.01, 0.001, and  
607 0.0001).

608

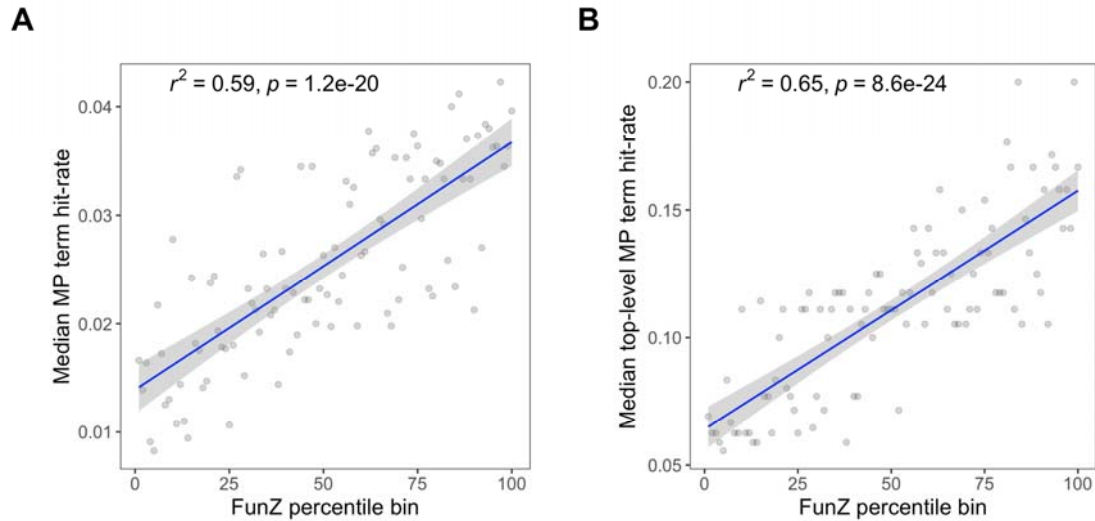

609

610 **Figure 5** -- Mouse gene constraint is positively correlated with an increased number of knockout  
611 phenotypes. Mouse Phenotype Ontology (MP) terms associated with 5,486 mouse knockouts were  
612 obtained from the International Mouse Phenotyping Consortium. The MP term hit-rate for each  
613 knockout was calculated by adjusting the total MP terms associated with each knockout by the  
614 potential number of MP terms (determined by the phenotyping tests that were performed). Knockouts  
615 were binned from 1 to 100 based on their funZ percentile, with the least constrained genes in the 1<sup>st</sup>  
616 bin and the most constrained genes in the 100<sup>th</sup> bin. Regression lines are for (A) the median MP term  
617 hit-rate per knockout as a function of funZ percentile bin, and (B) the median top-level MP term hit-  
618 rate per knockout as a function of funZ percentile bin.

619

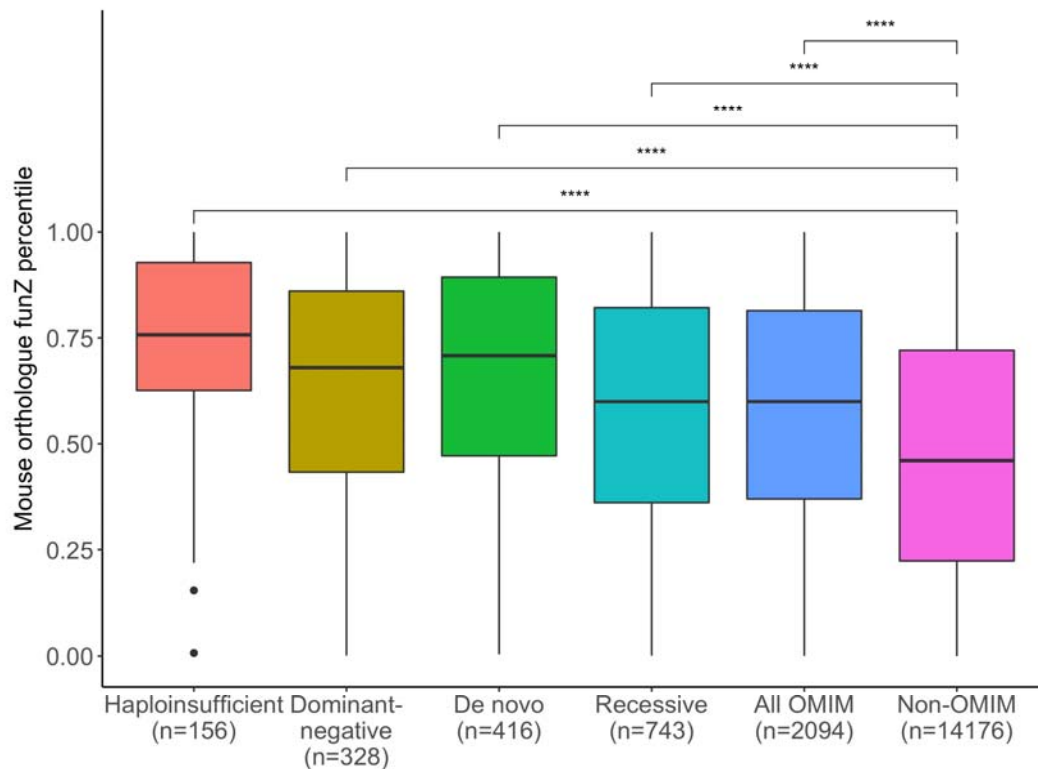

620

621 **Figure 6** – Distributions of constraint percentile for one-to-one mouse orthologues of human genes  
622 associated with Mendelian disease. Constraint was quantified for each gene as a percentile rank of  
623 funZ with a higher score indicating a greater degree of constraint. Mendelian disease gene lists were  
624 curated by Petrovski et al (2013) using key-word searches in the Online Mendelian Inheritance in  
625 Man (OMIM) database. Logistic regression models were used to assess the difference in constraint  
626 between each group and orthologues not included in any of the gene lists (non-OMIM). Mouse  
627 orthologues of human genes associated with Mendelian disease are significantly more constrained  
628 ( $p < 0.0001$ ) than mouse orthologues of human genes not include in any of the gene lists.

629

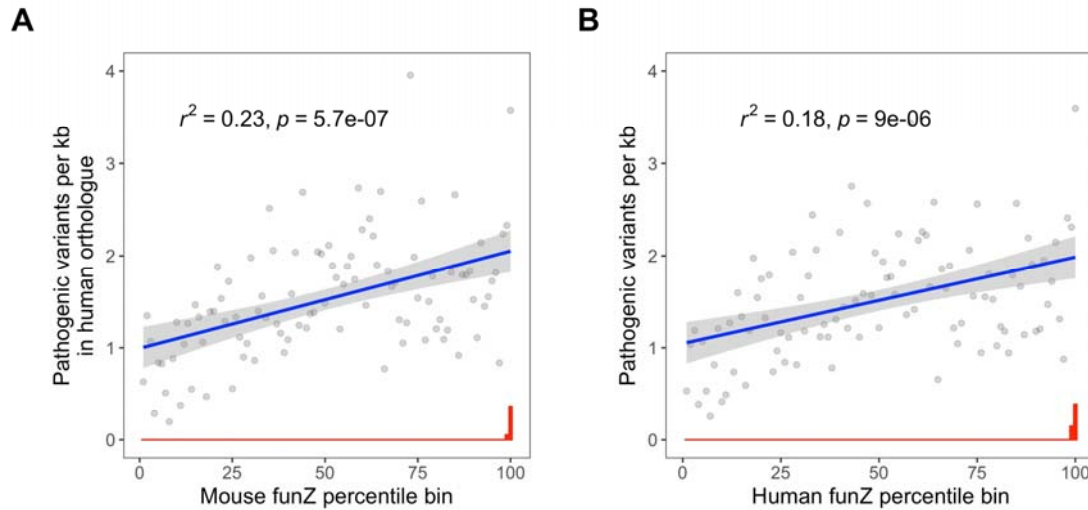

630

631 **Figure 7** – Mouse constraint is correlated with the number of known pathogenic variants in their  
632 human orthologues. Pathogenic variants were obtained from the ClinVar database (n = 52,174).  
633 15,680 mouse and 15,562 human orthologues were binned from 1 to 100 based on their funZ  
634 percentile, with the least constrained genes in the 1<sup>st</sup> bin and the most constrained genes in the 100<sup>th</sup>  
635 bin. Regression lines are for A) the mean number of pathogenic variants per kb in the human  
636 orthologue as a function of mouse funZ percentile bin ( $p=5.7.e-07$ ), and B) the mean number of  
637 pathogenic variants per kb as a function of human funZ percentile bin ( $p=9.1e-06$ ). Standard error is  
638 highlighted in grey. The median number of pathogenic variants per kb for each percentile bin is given  
639 in red, and highlights an enrichment of known pathogenic variants in the two percentiles containing  
640 the most constrained genes in humans and mice. Gene constraint can be in part explained by variants  
641 in more constrained genes having an increased likelihood of being pathogenic.

642

643

#### 644 **TABLES**

645

646 **Table 1** – Efficacy of funZ, RVIS, missense Z-score, and pLI in predicting gene lists from the Online  
647 Mendelian Inheritance in Man (OMIM) database. FunZ is calculated for the gene and the mouse  
648 orthologue. Keyword searches include “haploinsufficiency” (n=151), “dominant-negative” (n=317),

649 “de novo” (n=383), and “recessive” (n=687), in addition to a list of all OMIM disease genes  
 650 (n=1,917). We used logistic regression to assess the difference in constraint between genes with no  
 651 OMIM disease gene association (n=9,906), and each of the OMIM gene lists.

| OMIM search term (n)             |                         | Missense Z-score | pLI            | RVIS            | Human funZ     | Mouse funZ     |
|----------------------------------|-------------------------|------------------|----------------|-----------------|----------------|----------------|
| “haploinsufficiency”<br>(n=151), | Estimate<br>(Std error) | 3.40 (0.36)      | 2.35<br>(0.22) | -3.23<br>(0.35) | 3.61<br>(0.37) | 3.47<br>(0.36) |
|                                  | P                       | 8.1e-21          | 1.5e-25        | 4.8e-20         | 1.5e-22        | 1.0e-21        |
|                                  | ROC                     | 0.74             | 0.76           | 0.73            | 0.75           | 0.75           |
| “dominant-negative”<br>(n=317)   | Estimate<br>(Std error) | 1.73 (0.21)      | 1.01<br>(0.13) | -1.60<br>(0.21) | 1.75<br>(0.21) | 1.50<br>(0.21) |
|                                  | P                       | 3.9e-16          | 8.9e-15        | 2.5e-14         | 9.8e-17        | 4.6e-13        |
|                                  | ROC                     | 0.64             | 0.62           | 0.63            | 0.64           | 0.62           |
| “de novo” (n=383)                | Estimate<br>(Std error) | 2.24 (0.20)      | 1.26<br>(0.12) | -1.55<br>(0.19) | 2.10<br>(0.20) | 2.23<br>(0.20) |
|                                  | P                       | 2.0e-28          | 1.0e-25        | 3.4e-16         | 3.3e-26        | 9.4e-29        |
|                                  | ROC                     | 0.67             | 0.65           | 0.62            | 0.66           | 0.67           |

|                                      |                            |              |                 |                 |                |                |
|--------------------------------------|----------------------------|--------------|-----------------|-----------------|----------------|----------------|
| “recessive” (n=687)                  | Estimate<br>(Std<br>error) | -0.37 (0.14) | -0.39<br>(0.10) | -0.38<br>(0.14) | 0.68<br>(0.14) | 0.92<br>(0.14) |
|                                      | P                          | 6.9e-03      | 1.1e-04         | 5.8e-03         | 7.1e-07        | 4.6e-11        |
|                                      | ROC                        | 0.53         | 0.56            | 0.53            | 0.56           | 0.58           |
| all OMIM disease genes<br>(n=1,917). | Estimate<br>(Std<br>error) | 0.27 (0.09)  | 0.04<br>(0.06)  | -0.68<br>(0.09) | 0.87<br>(0.09) | 0.96<br>(0.09) |
|                                      | P                          | 1.3e-03      | 4.7e-01         | 5.4e-15         | 2.1e-23        | 1.2e-27        |
|                                      | ROC                        | 0.52         | 0.51            | 0.56            | 0.57           | 0.58           |

652

653

#### 654 **ACKNOWLEDGMENTS**

655

656 We would like to acknowledge Hugh Morgan and Luis Santos of MRC Harwell for their feedback

657 and contribution to analysing data from the IMPC.

658

#### 659 **AUTHOR CONTRIBUTIONS**

660

661 C. Lindgren and G. Powell conceived of the presented idea. G. Powell performed the analysis,

662 designed the figures, and wrote the manuscript. All other authors helped support, plan, and supervise

663 the work, and contributed to verifying the analytical methods and producing the final manuscript.
